# Supplementary material
Source: PubMed Central journal article supplement (PMC6415766)
Supplement: NIHMS1011555-supplement-1.pdf [file NIHMS1011555-supplement-1.pdf]

**Supplemental Table 1:** Detailed definitions of variable used in this study.

- Osteopenia was defined as a BMD T-score of -1 to -2.5 and osteoporosis as a BMD T-score of > -2.5
- A PTH drop of >50% from pre-excision PTH at 10 minutes post-excision was considered as biochemical cure to conclude the operation.
- Transient and permanent hypoparathyroidism was defined by PTH and serum calcium below the lower limit of normal requiring calcium replacement within 6 months and past 6 months after reoperation, respectively.
- Successful autograft implantation was defined as normal serum calcium and PTH levels at least 8 weeks after re-implantation in a patient not requiring calcium replacement.
- Patient outcome was defined as the postoperative serum calcium and PTH levels (cured, persistent or recurrent) at last follow up.
- Genotype classification used two groups on the basis of the specific MEN1 mutation (Reference 17, 21). Group 1 consisted of nonsense or frameshift mutations in exons 2, 9 and 10, and group 2 included all other mutations.
- Follow-up time was calculated from the time of reoperation to the last contact with the patient, in clinic or by phone.
- Persistent or recurrent pHPT was defined as hypercalcemia occurring either within 6 months or after 6 months after reoperation, respectively.

**Supplemental Table 2.** Comparison between pre- and postoperative variables

|                                    | <b>Preoperative</b> | <b>Postoperative *</b> | <b>P-Value **</b> |
|------------------------------------|---------------------|------------------------|-------------------|
| <b>PTH (pg/mL, mean)</b>           | 131.4               | 60.2                   | <b>&lt;0.0001</b> |
| <b>Ca (mg/dL, mean)</b>            | 2.66                | 2.30                   | <b>&lt;0.0001</b> |
| <b>BMD (T-Score, mean) †</b>       | 1.9                 | 2.0                    | 0.6               |
| <b>Nephrocalcinosis (fraction)</b> | 10/18               | 6/18                   | <b>0.046</b>      |

\*At last Follow up

\*\* Paired Sample T-Test or Wilcoxon Rank Test

† BMD: Bone mineral density at femur and/or spine
